# Supplementary material
Source: publisher figshare collection journal article supplement (https://tandf.figshare.com/ndownloader/files/11133305)
Supplement: Supplementary file 1 [file 11133305]

## An epidemiological investigation of an idiopathic myopathy in hunting dogs in New Zealand

H Hunt<sup>\*§</sup>, N J Cave<sup>\*</sup>, BD Gartrell<sup>\*</sup>, N Cogger<sup>\*</sup>, J Petersen<sup>†</sup>, WD Roe<sup>\*</sup>

<sup>\*</sup>Institute of Veterinary, Animal, and Biomedical Sciences, Massey University, Palmerston North, New Zealand

<sup>†</sup>Norvet Services, PO Box 80, Okaihau, Northland 0447, New Zealand

<sup>§</sup>Author for correspondence. Email: h.hunt@massey.ac.nz

### Supplementary Table 1. Questionnaire used for survey conducted with owners of dogs diagnosed with GSM by telephone.

#### GO SLOW MYOPATHY – TELEPHONE CASE QUESTIONNAIRE

##### PART A

| OWNER DETAILS                                                 |             |
|---------------------------------------------------------------|-------------|
| NAME:                                                         |             |
| (first name)                                                  | (last name) |
| ADDRESS :                                                     |             |
| PHONE:                                                        | EMAIL:      |
| USUAL VETERINARIAN:                                           |             |
| HOW LONG HAVE YOU BEEN INVOLVED IN PIG HUNTING?               |             |
| WHERE, AND HOW OFTEN, DO YOU USUALLY GO HUNTING (USING DOGS)? |             |
| HOW MANY DOGS DO YOU HAVE THAT ARE USED FOR PIG HUNTING?      |             |

##### PART B

| DOG DETAILS                                |                                               |
|--------------------------------------------|-----------------------------------------------|
| NAME:                                      | AGE:                                          |
| BREED:                                     |                                               |
| GENDER: Male / Female (circle one)         | If female, has she ever had puppies? Yes / No |
| DESEXED: Yes / No                          |                                               |
| HOW LONG HAVE YOU HAD THIS DOG?            |                                               |
| WHERE DID YOU GET THIS DOG FROM?           |                                               |
| TYPE OF DOG (e.g. finder, holder, bailer): |                                               |

**WHAT HAS THIS DOG EATEN IN THE LAST WEEK? Include the relative proportions of each type of food, and for meat, whether it was previously frozen/cooked/raw.**

**DO YOU EVER FEED WILD PORK OR TRIMMINGS TO YOUR DOGS? Yes / No**

*If yes, when did you last feed wild pig in relation to the onset of 'Go Slow'?*

**HEALTH:**

*Date of last worm treatment and product used:*

*Date of last flea treatment and product used:*

*Date of last vaccination:*

No

*Is this dog vaccinated for leptospirosis: Yes /*

## **PART C**

### **DETAILS OF EPISODE OF MUSCLE PAIN / WEAKNESS ('GO SLOW')**

**DATE FIRST CLINICAL SIGNS OF MUSCLE PAIN / WEAKNESS WERE NOTICED:**

**HAS THIS DOG HAD ANY SIMILAR PROBLEMS IN THE PAST?**

**WHAT CLINICAL SIGNS WERE OBSERVED AND HOW DID THESE CHANGE OVER TIME? (e.g. stiffness, difficulty standing, collapse, tiring easily)**

**HAS A VETERINARIAN BEEN INVOLVED IN THE DIAGNOSIS & TREATMENT OF THIS CASE?**

*If yes, please write the name of the veterinarian and their clinic here:*

**ANY OTHER DOGS AFFECTED? Yes / No (circle one) IF YES, HOW MANY?**

**WAS THERE ANYTHING THAT SEEMED TO IMPROVE OR WORSEN THE CLINICAL SIGNS IN THIS DOG? (e.g. rest, exercise, heat, cold)**

**HAS THE DOG COMPLETELY RECOVERED FROM THIS EPISODE? Yes / No**

*If yes, how long did it take to return to normal?*

*If no, what are the on-going effects?*

|                                                                                                                                                                                                                                                                                                                                                   |
|---------------------------------------------------------------------------------------------------------------------------------------------------------------------------------------------------------------------------------------------------------------------------------------------------------------------------------------------------|
| <p><b>HOW MANY HUNTS HAS THIS DOG BEEN ON IN THE LAST 8 WEEKS?</b></p> <p><b>DETAILS OF LAST HUNT</b></p> <p><b>Date:</b></p> <p><b>Duration:</b></p> <p><b>Location (as specific as possible):</b></p> <p><b>Number of pigs caught:</b></p> <p><b>Number of dogs used:</b></p> <p><b>Any injuries to dogs:</b></p> <p><b>Other comments:</b></p> |
| <p><b>IS THIS DOG A WORKING FARM DOG?    Yes   /   No</b></p> <p><b><i>If yes, what type of country does this dog work on, and how often?</i></b></p>                                                                                                                                                                                             |
| <p><b>ANY OTHER COMMENTS: (e.g. general health of dog, any other medical issues, any other experiences or thoughts about 'Go Slow')</b></p>                                                                                                                                                                                                       |

## PART D

### INFORMED VERBAL CONSENT

The following statement was read to and agreed upon by all participants,:

*I understand that the information collected on this form, or verbally, will be used as part of a PhD research project investigating myopathies in pig dogs. Data and conclusions from the study may be published, but no uniquely identifiable information about respondents or their dogs will be shared at any time. In addition, I authorise the investigator to access any relevant veterinary records regarding the care and treatment of the dog named in this questionnaire.*

---

**Supplementary Table 2. Questionnaire used for online survey regarding the hunting activities, diet and health of pig hunting dogs in New Zealand.**

---

**Pig dog hunting, diet & health in New Zealand**

---

**Hunting Habits****1) In the last 12 months, which regions have you hunted in?**

- ☐ Northland
- ☐ Auckland
- ☐ Waikato
- ☐ Bay of Plenty
- ☐ Gisborne
- ☐ Hawke's Bay
- ☐ Taranaki
- ☐ Manawatu-Wanganui
- ☐ Wellington
- ☐ Nelson
- ☐ Marlborough
- ☐ Tasman
- ☐ West Coast
- ☐ Canterbury
- ☐ Otago
- ☐ Southland

**2) What type of land do you usually hunt on?**

- ☐ Native bush
- ☐ Pines
- ☐ Bush/pines around sheep and beef farms
- ☐ Bush/pines around dairy farms
- ☐ Other: \_\_\_\_\_

**3) For each time of year, select how often you usually go hunting (with dogs)**

|                     | <b>Less than once a month</b> | <b>Once every 3-4 weeks</b> | <b>Once every 1-2 weeks</b> | <b>Every week</b> | <b>2-3 times a week</b> | <b>Almost every day</b> |
|---------------------|-------------------------------|-----------------------------|-----------------------------|-------------------|-------------------------|-------------------------|
| Winter (June - Aug) | ( )                           | ( )                         | ( )                         | ( )               | ( )                     | ( )                     |
| Spring (Sept - Nov) | ( )                           | ( )                         | ( )                         | ( )               | ( )                     | ( )                     |
| Summer (Dec - Feb)  | ( )                           | ( )                         | ( )                         | ( )               | ( )                     | ( )                     |
| Autumn (Mar - May)  | ( )                           | ( )                         | ( )                         | ( )               | ( )                     | ( )                     |

---

**Dogs****4) How many dogs do you currently have that are used for pig hunting?**

- ( ) 1  
 ( ) 2  
 ( ) 3  
 ( ) 4  
 ( ) 5  
 ( ) 6  
 ( ) 7  
 ( ) 8  
 ( ) 9  
 ( ) 10 or more

---

**5) To help us choose one dog to focus on for the rest of the survey, list the names of up to 3 of your dogs below (in any order).**

Dog 1: \_\_\_\_\_

Dog 2: \_\_\_\_\_

Dog 3: \_\_\_\_\_

---

Dog details

**6) Tell us about your dog [Question 5, "Dog 2"]**

**Age and breed:**

Age (years): \_\_\_\_\_

Breed: \_\_\_\_\_

**Gender:**

☐ Male

☐ Female

**Type of dog (*tick all that apply*):**

☐ Finder

☐ Bailer

☐ Holder

☐ Other: \_\_\_\_\_

---

Dog diet

**7) In the last 7 days, what has your dog ["Dog 2"] eaten? *Tick all that apply***

☐ Meat, offal or bones from wild animals

☐ Meat, offal or bones from home-kill animals

☐ Meat, offal or bones from a butcher or supermarket (including Mighty Mix)

☐ Dog roll

☐ Canned dog food

☐ Dry dog food (biscuits)

☐ Table scraps (other than meat)

☐ Milk

☐ Other: \_\_\_\_\_

**8) What types of meat and animal products are included in your answer to the last question? *Tick all that apply***

|         | <b>Meat<br/>(muscle)</b> | <b>Offal<br/>(organs)</b> | <b>Bones</b>             |
|---------|--------------------------|---------------------------|--------------------------|
| Cattle  | <input type="checkbox"/> | <input type="checkbox"/>  | <input type="checkbox"/> |
| Sheep   | <input type="checkbox"/> | <input type="checkbox"/>  | <input type="checkbox"/> |
| Pig     | <input type="checkbox"/> | <input type="checkbox"/>  | <input type="checkbox"/> |
| Chicken | <input type="checkbox"/> | <input type="checkbox"/>  | <input type="checkbox"/> |
| Deer    | <input type="checkbox"/> | <input type="checkbox"/>  | <input type="checkbox"/> |
| Possum  | <input type="checkbox"/> | <input type="checkbox"/>  | <input type="checkbox"/> |
| Goat    | <input type="checkbox"/> | <input type="checkbox"/>  | <input type="checkbox"/> |

**9) What brand(s) of dog roll, dry and canned dog food has your dog eaten in the last 7 days?**

\_\_\_\_\_

**10) Do you EVER let your dogs have access to wild pork or pig trimmings? *Choose one answer, or write in your own***

☐ Never

☐ I don't feed my dogs wild pig, but they occasionally get hold of some meat/offal

☐ I usually give my dogs offal/trimmings on a hunt or when I'm butchering the pig

☐ I sometimes feed wild pig to my dogs, but always freeze and/or cook it first

☐ I sometimes feed fresh (raw) wild pig to my dogs

☐ Wild pig (fresh, frozen or cooked) is a big part of my dogs diet

☐ Other: \_\_\_\_\_

---

**Pig Dog Health**

**11) Has your dog ['Dog 2"] been seen by a veterinarian in the last 12 months?**

☐ Yes

☐ No

**12) In the last 12 months, have you noticed any of the following in your dog ["Dog 2"]? *Tick all that apply***

☐ Broken bone(s)

☐ Decreased appetite / eating less

☐ Collapse

☐ Coughing

☐ Dental problems

☐ Diarrhoea

☐ Difficulty breathing

☐ Difficulty urinating

☐ Discharge from the eyes, nose or mouth

☐ Increased thirst / drinking

☐ Lameness

☐ Lethargy or tiring easily

☐ Seizure(s)

☐ Skin problems

☐ Stiffness in muscles or joints

☐ Strange behaviour

☐ Trembling/shaking

☐ Wounds

☐ Vomiting

☐ Weight gain

☐ Weight loss

☐ Other health issues: \_\_\_\_\_

---



---

**The researcher is planning a further study to investigate specific diseases in pig dogs. If you are happy to be contacted and answer a few follow-up questions, please enter your details below. Otherwise, leave these boxes blank.**

***Please note that by entering your details, your answers to the previous questions will no longer be anonymous. However, no personal or identifying information will ever be published or shared.***

First Name: \_\_\_\_\_

Last Name: \_\_\_\_\_

Email Address: \_\_\_\_\_

Phone Number: \_\_\_\_\_

---

Thank You!
